# Supplementary material for: Maximum blood glucose levels during hospitalisation to predict mortality in patients with acute coronary syndrome: a retrospective cohort study
Source: HighWire-hosted journal article supplement (doi:10.1136/bmjopen-2020-042316), 2020-12-01
Supplement: bmjopen-2020-042316supp002_data_supplement.pdf [file bmjopen-2020-042316supp002_data_supplement.pdf]

Supplement Table 2. Baseline characteristics of demographics between diabetes and non-diabetes

| Variable                       | Diabetes(n=927) | Non-diabetes(n=2151) | p      |
|--------------------------------|-----------------|----------------------|--------|
| Age(years)                     | 67±12           | 67±14                | 0.534  |
| Male(n(%))                     | 577(62.2)       | 1456(67.7)           | 0.003  |
| ACS Categories                 |                 |                      | <0.001 |
| AMI(n(%))                      | 541(58.4)       | 1470(68.3)           |        |
| UA(n(%))                       | 386(41.6)       | 681(31.7)            |        |
| Comorbidities                  |                 |                      |        |
| Prior MI(n(%))                 | 107(11.5)       | 189(8.8)             | 0.017  |
| Hypertension(n(%))             | 538(58.0)       | 1123(52.2)           | 0.003  |
| Heart failure(n(%))            | 337(36.4)       | 695(32.3)            | 0.029  |
| Hyperlipidemia(n(%))           | 298(32.1)       | 524(24.4)            | <0.001 |
| COPD(n(%))                     | 6(0.6)          | 31(1.4)              | 0.064  |
| Atrial fibrillation(n(%))      | 243(26.2)       | 582(27.1)            | 0.628  |
| Cerebral infarction(n(%))      | 38(4.1)         | 67(3.1)              | 0.167  |
| Admission Drugs                |                 |                      |        |
| Aspirin(n(%))                  | 509(54.9)       | 1029(47.8)           | <0.001 |
| ACE inhibitor(n(%))            | 336(36.2)       | 929(43.2)            | <0.001 |
| β Blocker(n(%))                | 662(71.4)       | 1559(72.5)           | 0.545  |
| Clopidogrel(n(%))              | 219(23.6)       | 416(19.3)            | 0.007  |
| Diuretic(n(%))                 | 559(60.3)       | 1091(50.7)           | <0.001 |
| Statin(n(%))                   | 444(47.9)       | 937(43.6)            | 0.027  |
| Insulin(n(%))                  | 614(66.2)       | 783(36.4)            | <0.001 |
| Oral hypoglycemic agents(n(%)) | 180(19.4)       | 13(0.6)              | <0.001 |

## Initial laboratory data

|                          |           |            |        |
|--------------------------|-----------|------------|--------|
| WBC, 10 <sup>3</sup> /uL | 11.5±5.1  | 11.7±5.2   | 0.332  |
| Hemoglobin, mg/dl        | 11.2±2.1  | 11.9±2.1   | <0.001 |
| Creatinine, mg/dl        | 1.4±1.2   | 1.1±0.9    | <0.001 |
| SOFA score               | 4.4±3.1   | 3.6±2.9    | <0.001 |
| Serum glucose, mmol/L    |           |            |        |
| glucose <sub>0</sub>     | 10.5±5.3  | 7.7±3.4    | <0.001 |
| glucose <sub>max</sub>   | 13.8±5.6  | 10.4±5.9   | <0.001 |
| glucose <sub>min</sub>   | 5.4±2.4   | 5.1±1.3    | <0.001 |
| Survivors                | 842(90.8) | 1938(90.1) | 0.528  |

---

Abbreviations: ACS, acute coronary syndrome; AMI, acute myocardial infarction; UA, unstable angina; MI, myocardial infarction; COPD, chronic obstructive pulmonary disease; ACE, angiotension converting enzyme; WBC, white blood cell; SOFA, sequential organ failure assessment; glucose<sub>0</sub>, initial glucose after intensive care unit admission; glucose<sub>max</sub>, maximum glucose during ICU stay; glucose<sub>min</sub>, mean glucose during ICU stay.
